# Supplementary material for: Insight into the Fischer–Tropsch mechanism on hcp-Fe7C3 (211) by density functional theory: the roles of surface carbon and vacancies
Source: Royal Society of Chemistry journal article supplement (doi:10.1039/d1ra06396k), 2021-01-01
Supplement: d1ra06396k1.pdf [file d1ra06396k1.pdf]

## Supporting Information

### **Insight into the Fischer-Tropsch mechanism on hcp-Fe<sub>7</sub>C<sub>3</sub>(211) by Density function theory : the role of surface carbon and vacancy**

Jie Ren <sup>a,b</sup>, Ning Ai <sup>\*a</sup> and Yingzhe Yu <sup>\*b</sup>

<sup>a</sup> College of Biological, Chemical Sciences and Engineering, Jiaxing University, Jiaxing 314001, P. R. China

<sup>b</sup> Key Laboratory for Green Chemical Technology of Ministry of Education, R&D Center for Petrochemical Technology, Tianjin University, Tianjin 300072, P. R. China

\*Corresponding author

Ning Ai: E-mail address: [aining@tsinghua.org.cn](mailto:aining@tsinghua.org.cn)

Yingzhe Yu: E-mail address: [yuyingzhe@tju.edu.cn](mailto:yuyingzhe@tju.edu.cn)

## The structures of the elementary reactions in the C<sup>1</sup>-C<sup>2</sup> coupling pathway

| Elementary reactions                                                     | Initial states | Transition states | Final states |
|--------------------------------------------------------------------------|----------------|-------------------|--------------|
| 1.<br>C <sup>1</sup> +H<br>=HC <sup>1</sup>                              |                |                   |              |
| 2.<br>HC <sup>1</sup> +H<br>=H <sub>2</sub> C <sup>1</sup>               |                |                   |              |
| 3.<br>H <sub>2</sub> C <sup>1</sup> +H<br>=H <sub>3</sub> C <sup>1</sup> |                |                   |              |
| 4.<br>H <sub>3</sub> C <sup>1</sup> +H<br>=H <sub>4</sub> C <sup>1</sup> |                |                   |              |
| 5.<br>C <sup>2</sup> +H<br>=HC <sup>2</sup>                              |                |                   |              |
| 6.<br>HC <sup>2</sup> +H<br>=H <sub>2</sub> C <sup>2</sup>               |                |                   |              |
| 7.<br>H <sub>2</sub> C <sup>2</sup> +H<br>=H <sub>3</sub> C <sup>2</sup> |                |                   |              |
| 8.<br>H <sub>3</sub> C <sup>2</sup> +H<br>=H <sub>4</sub> C <sup>2</sup> |                |                   |              |

9.  
 $C^1+C^2$   
 $=C^1C^2$

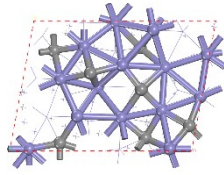

$\bar{z}$

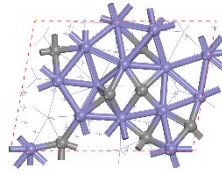

$\bar{z}$

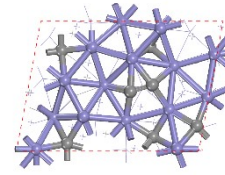

$\bar{z}$

10.  
 $C^1+HC^2$   
 $=C^1HC^2$

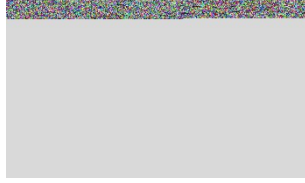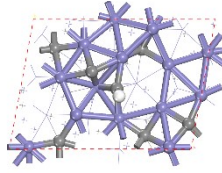

$\bar{z}$

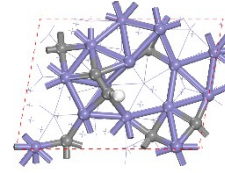

$\bar{z}$

11.  
 $C^1+H_2C^2$   
 $=C^1H_2C^2$

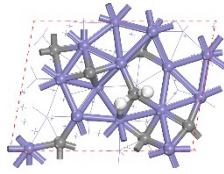

$\bar{z}$

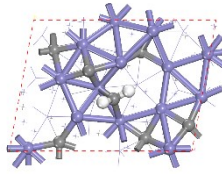

$\bar{z}$

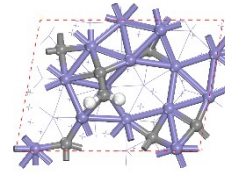

$\bar{z}$

12.  
 $C^1+H_3C^2$   
 $=C^1H_3C^2$

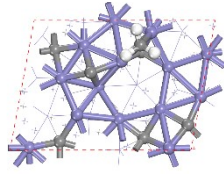

$\bar{z}$

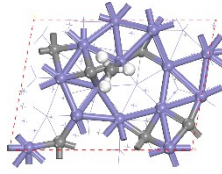

$\bar{z}$

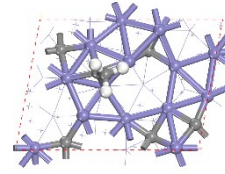

$\bar{z}$

13.  
 $HC^1+C^2$   
 $=HC^1C^2$

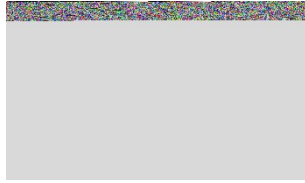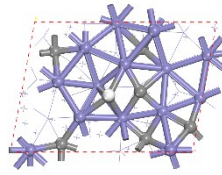

$\bar{z}$

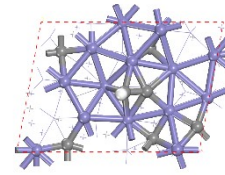

$\bar{z}$

14.  
 $HC^1+HC^2$   
 $=HC^1HC^2$

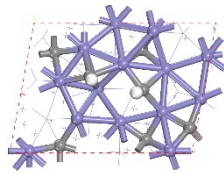

$\bar{z}$

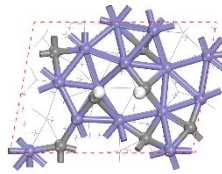

$\bar{z}$

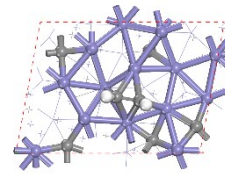

$\bar{z}$

15.  
 $HC^1+H_2C^2$   
 $=HC^1H_2C^2$

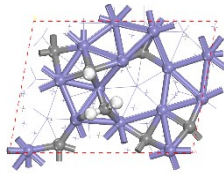

$\bar{z}$

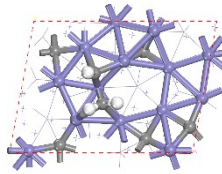

$\bar{z}$

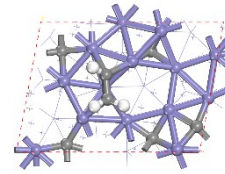

$\bar{z}$

16.  
 $HC^1+H_3C^2$   
 $=HC^1H_3C^2$

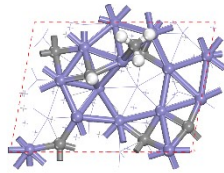

$\bar{z}$

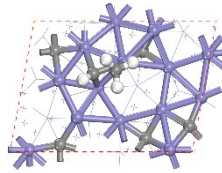

$\bar{z}$

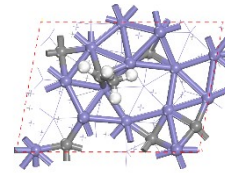

$\bar{z}$

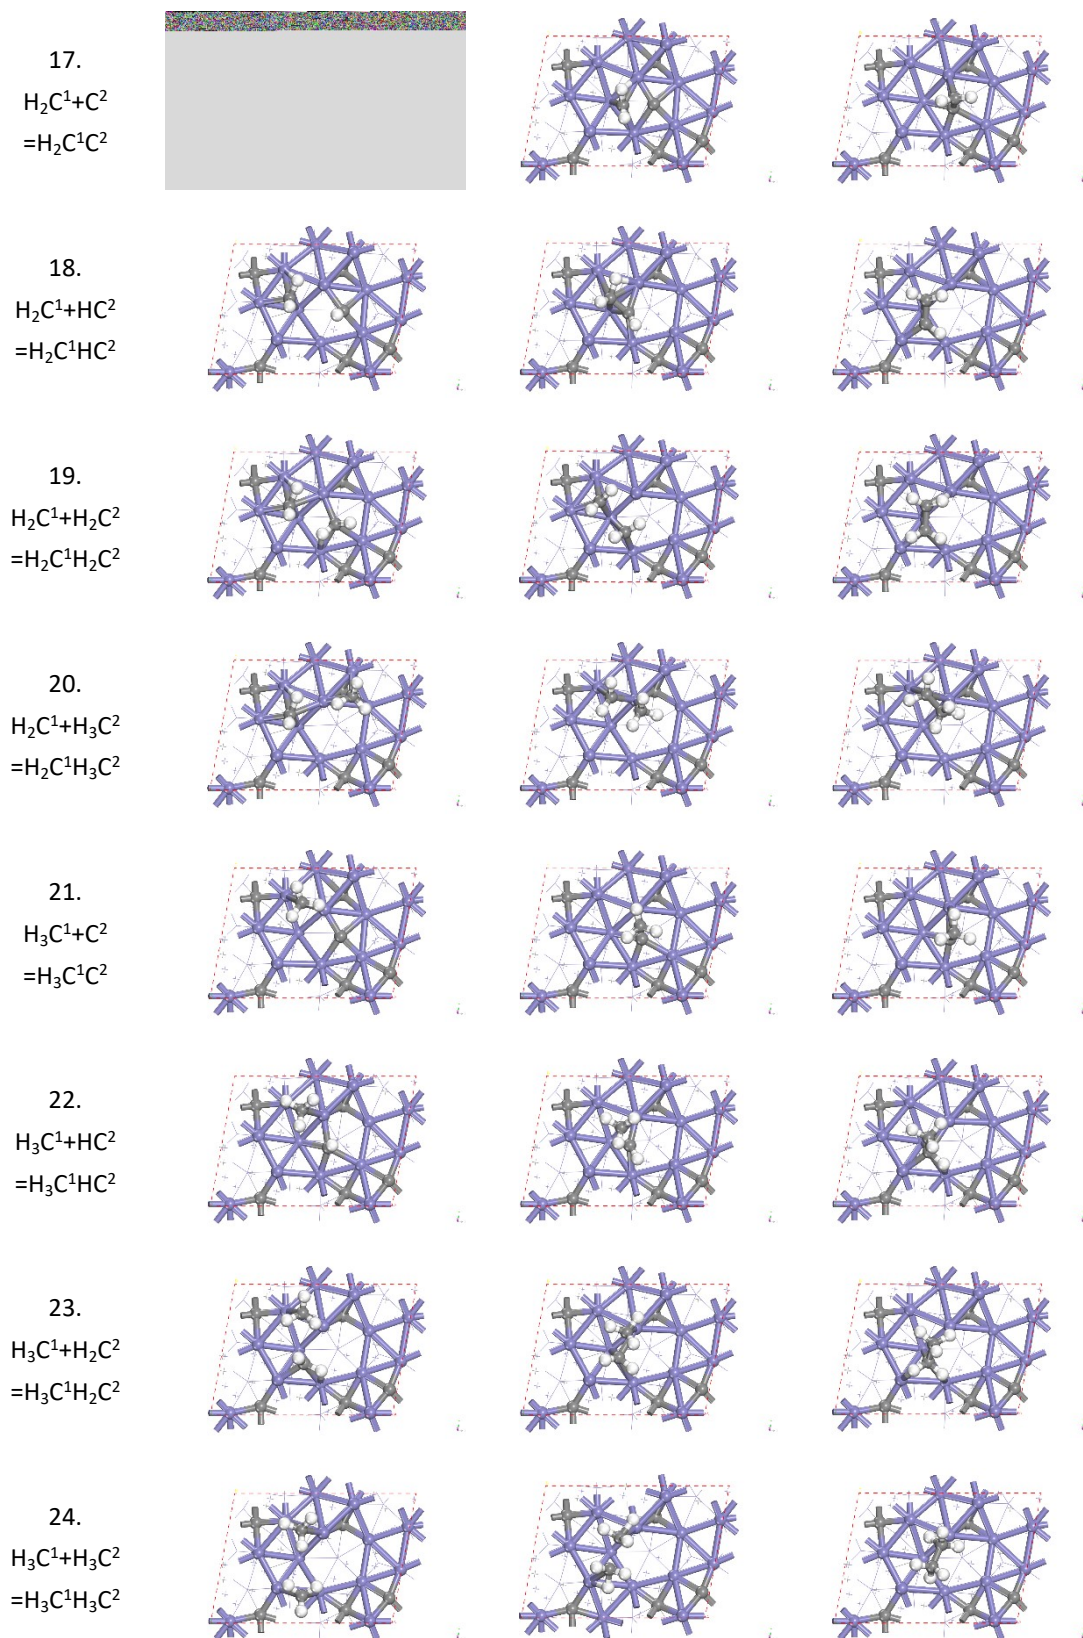

**Figure S1.** The structures of initial states, transition states, and final states about the C<sup>1</sup>-C<sup>2</sup> coupling pathway on hcp-Fe<sub>7</sub>C<sub>3</sub> (211) surface. Blue: Fe atoms; gray: C atoms; red: O atoms; white: H atoms.

**The energy barrier and structures of the migration reactions in the C<sup>1</sup>-C<sup>2</sup> coupling pathway**

| Elementary reactions                                                     | reactant structure | Reference structure* | Highest barrier energy of Migration reaction (eV) | Total reaction energy of Migration reaction (eV) |
|--------------------------------------------------------------------------|--------------------|----------------------|---------------------------------------------------|--------------------------------------------------|
| 1.<br>C <sup>1</sup> +H<br>=HC <sup>1</sup>                              |                    |                      | 0                                                 | 0                                                |
| 2.<br>HC <sup>1</sup> +H<br>=H <sub>2</sub> C <sup>1</sup>               |                    |                      | 0                                                 | 0                                                |
| 3.<br>H <sub>2</sub> C <sup>1</sup> +H<br>=H <sub>3</sub> C <sup>1</sup> |                    |                      | 0.11                                              | 0.09                                             |
| 4.<br>H <sub>3</sub> C <sup>1</sup> +H<br>=H <sub>4</sub> C <sup>1</sup> |                    |                      | 0                                                 | 0                                                |
| 5.<br>C <sup>2</sup> +H<br>=HC <sup>2</sup>                              |                    |                      | 0                                                 | 0                                                |
| 6.<br>HC <sup>2</sup> +H<br>=H <sub>2</sub> C <sup>2</sup>               |                    |                      | 0                                                 | 0                                                |

---

|                                                                                                       |  |  |      |       |
|-------------------------------------------------------------------------------------------------------|--|--|------|-------|
| 7.<br>H <sub>2</sub> C <sup>2</sup> +H<br>=H <sub>3</sub> C <sup>2</sup>                              |  |  | 0.01 | -0.09 |
| 8.<br>H <sub>3</sub> C <sup>2</sup> +H<br>=H <sub>4</sub> C <sup>2</sup>                              |  |  | 0    | 0     |
| 9.<br>C <sup>1</sup> +C <sup>2</sup><br>=C <sup>1</sup> C <sup>2</sup>                                |  |  | 0    | 0     |
| 10.<br>C <sup>1</sup> +HC <sup>2</sup><br>=C <sup>1</sup> HC <sup>2</sup>                             |  |  | 0    | 0     |
| 11.<br>C <sup>1</sup> +H <sub>2</sub> C <sup>2</sup><br>=C <sup>1</sup> H <sub>2</sub> C <sup>2</sup> |  |  | 0.01 | -0.09 |
| 12.<br>C <sup>1</sup> +H <sub>3</sub> C <sup>2</sup><br>=C <sup>1</sup> H <sub>3</sub> C <sup>2</sup> |  |  | 0.29 | -0.45 |
| 13.<br>HC <sup>1</sup> +C <sup>2</sup><br>=HC <sup>1</sup> C <sup>2</sup>                             |  |  | 0    | 0     |

---

|     |                                                                                     |                                                                                      |      |       |
|-----|-------------------------------------------------------------------------------------|--------------------------------------------------------------------------------------|------|-------|
| 14. |    |    | 0    | 0     |
| 15. |    |    | 0.67 | 0.39  |
| 16. |    |    | 0.29 | -0.46 |
| 17. |   |   | 0    | 0     |
| 18. |  |  | 0    | 0     |
| 19. |  |  | 0.01 | -0.09 |
| 20. |  |  | 0.29 | -0.46 |

|                                                                                                   |                                                                                    |                                                                                     |      |       |
|---------------------------------------------------------------------------------------------------|------------------------------------------------------------------------------------|-------------------------------------------------------------------------------------|------|-------|
| 21.<br>$\text{H}_3\text{C}^1+\text{C}^2$<br>$=\text{H}_3\text{C}^1\text{C}^2$                     |   |   | 0.10 | -0.13 |
| 22.<br>$\text{H}_3\text{C}^1+\text{HC}^2$<br>$=\text{H}_3\text{C}^1\text{HC}^2$                   |   |   | 0.10 | -0.17 |
| 23.<br>$\text{H}_3\text{C}^1+\text{H}_2\text{C}^2$<br>$=\text{H}_3\text{C}^1\text{H}_2\text{C}^2$ |   |   | 0.30 | -0.34 |
| 24.<br>$\text{H}_3\text{C}^1+\text{H}_3\text{C}^2$<br>$=\text{H}_3\text{C}^1\text{H}_3\text{C}^2$ |  |  | 0.10 | -0.62 |

\*The reference structure of the C-C coupling reaction is the final structure of the stepwise hydrogenation reaction.

\*The reference structure of the stepwise hydrogenation reaction is the final structure of the stepwise hydrogenation reaction in the former hydrogenation elementary reaction.

**Figure S2.** The reactant structure, reference structure and the migration energy about the  $\text{C}^1\text{-C}^2$  coupling pathway on hcp- $\text{Fe}_7\text{C}_3$  (211) surface. Blue: Fe atoms; gray: C atoms; red: O atoms; white: H atoms.



## The structures of the elementary reactions in the stepwise hydrogenation pathway of C<sub>2</sub> species

| Elementary reactions                                                                                  | Initial states | Transition states | Final states |
|-------------------------------------------------------------------------------------------------------|----------------|-------------------|--------------|
| 1.<br>H+C <sup>1</sup> C <sup>2</sup><br>=HC <sup>1</sup> C <sup>2</sup>                              |                |                   |              |
| 2.<br>C <sup>1</sup> C <sup>2</sup> + H<br>=C <sup>1</sup> HC <sup>2</sup>                            |                |                   |              |
| 3.<br>HC <sup>1</sup> C <sup>2</sup> + H<br>=HC <sup>1</sup> HC <sup>2</sup>                          |                |                   |              |
| 4.<br>C <sup>1</sup> HC <sup>2</sup> + H<br>=C <sup>1</sup> H <sub>2</sub> C <sup>2</sup>             |                |                   |              |
| 5.<br>H+HC <sup>1</sup> C <sup>2</sup><br>=H <sub>2</sub> C <sup>1</sup> C <sup>2</sup>               |                |                   |              |
| 6.<br>H+C <sup>1</sup> HC <sup>2</sup><br>=HC <sup>1</sup> HC <sup>2</sup>                            |                |                   |              |
| 7.<br>H+H <sub>2</sub> C <sup>1</sup> C <sup>2</sup><br>=H <sub>3</sub> C <sup>1</sup> C <sup>2</sup> |                |                   |              |

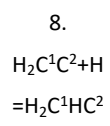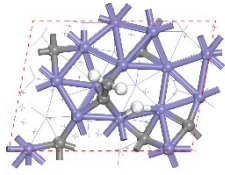

z

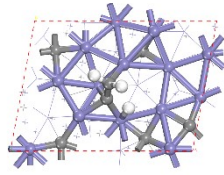

z

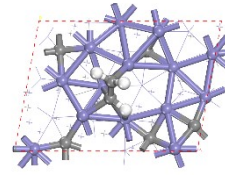

z

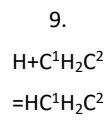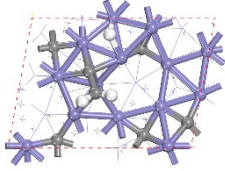

z

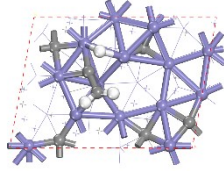

z

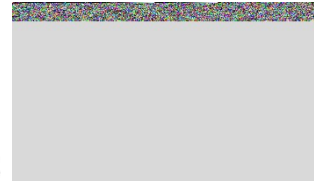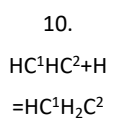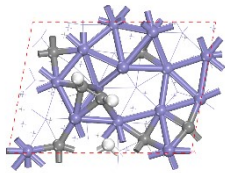

z

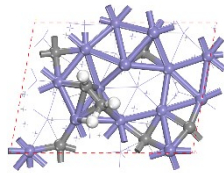

z

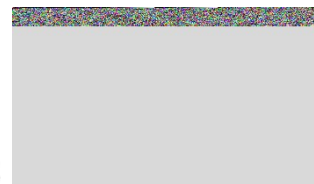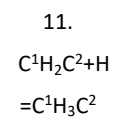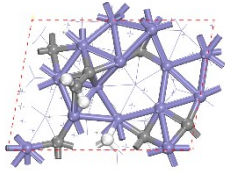

z

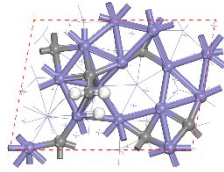

z

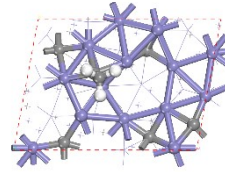

z

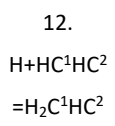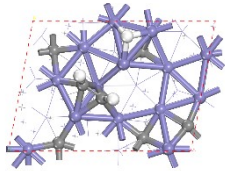

z

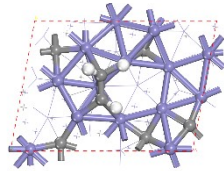

z

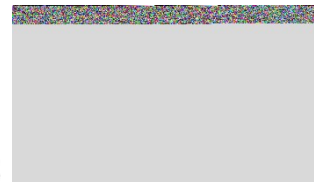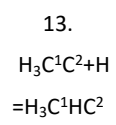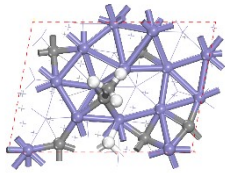

z

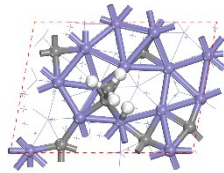

z

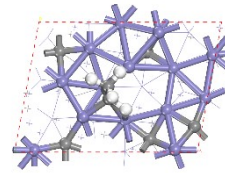

z

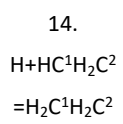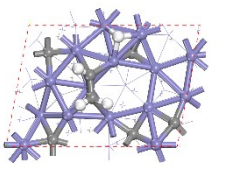

z

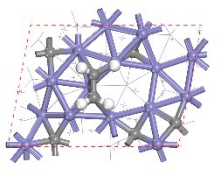

z

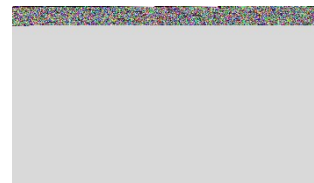

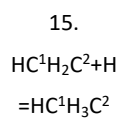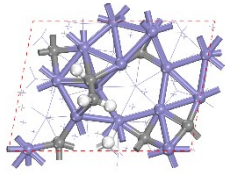

z

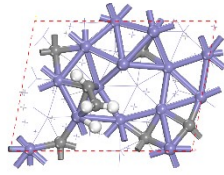

z

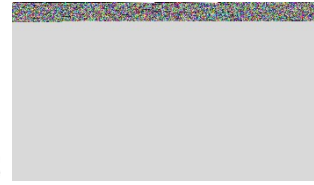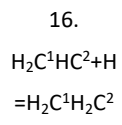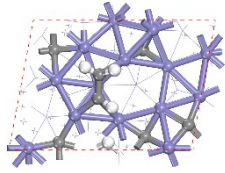

z

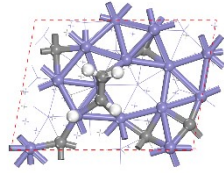

z

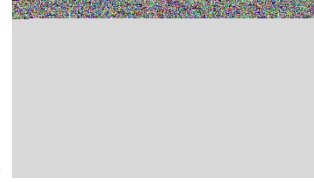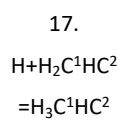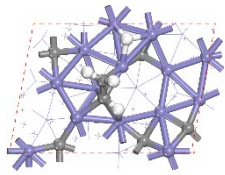

z

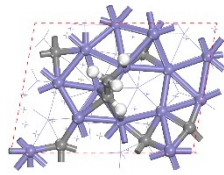

z

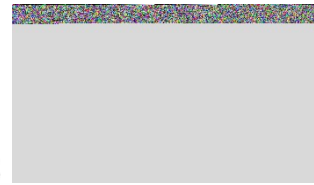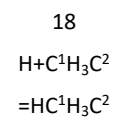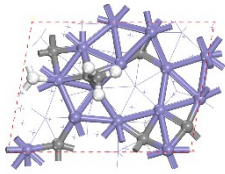

z

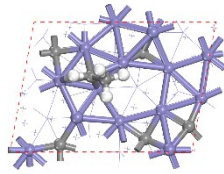

z

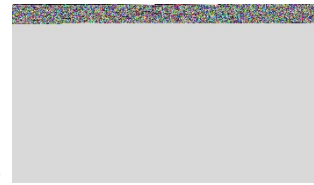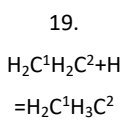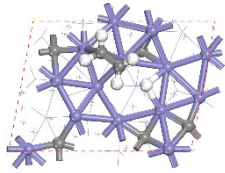

z

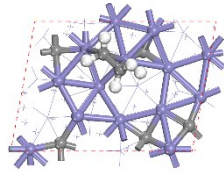

z

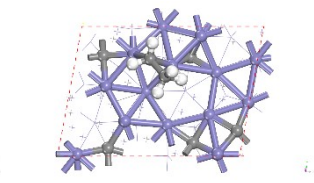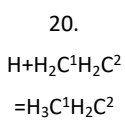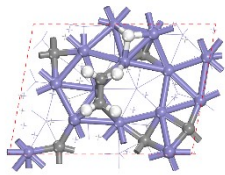

z

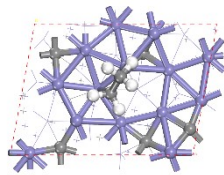

z

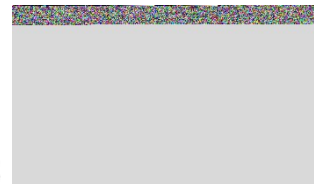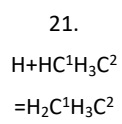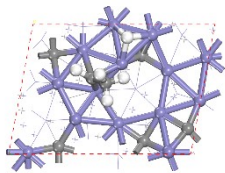

z

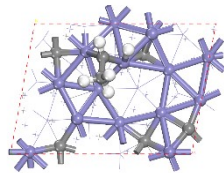

z

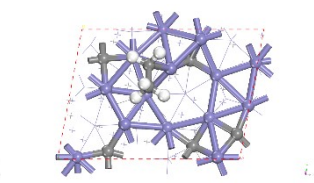

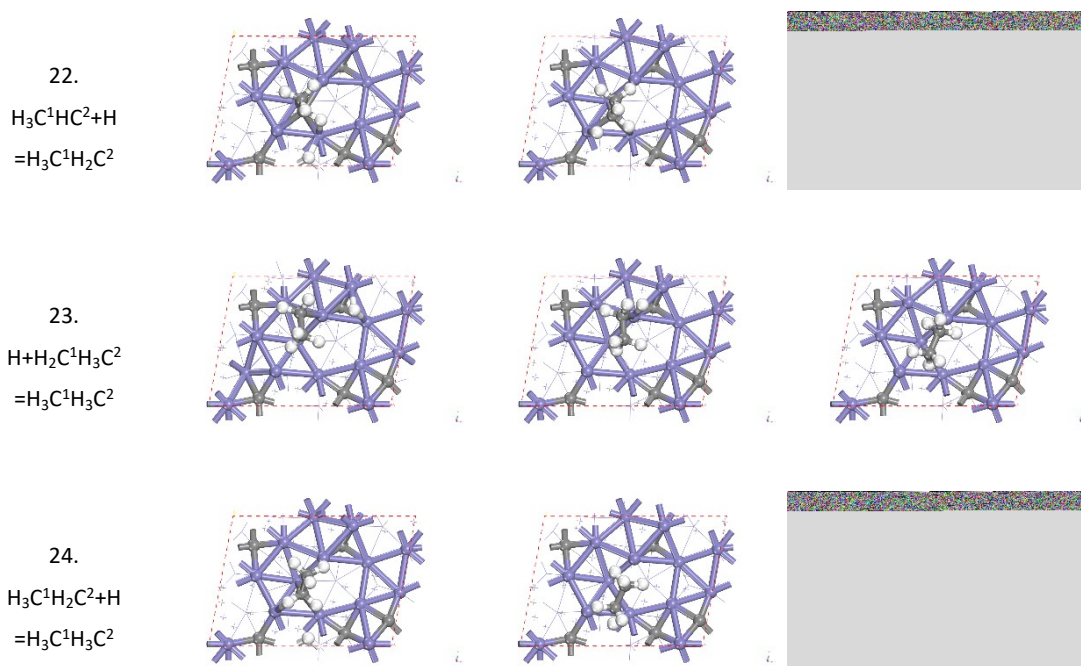

**Figure S3.** The structures of initial states, transition states, and final states about the stepwise hydrogenation pathway of  $\text{C}_2$  species on hcp- $\text{Fe}_7\text{C}_3$  (211) surface. Blue: Fe atoms; gray: C atoms; white: H atoms.

## The barrier energy and structures of the stepwise hydrogenation pathway of C<sub>2</sub> species

| Elementary reactions                                                                     | reactant structure                                                                  | Reference structure*                                                                 | Highest barrier energy of Migration reaction (eV) | Total reaction energy of Migration reaction (eV) |
|------------------------------------------------------------------------------------------|-------------------------------------------------------------------------------------|--------------------------------------------------------------------------------------|---------------------------------------------------|--------------------------------------------------|
| 1.<br>H+C <sup>1</sup> C <sup>2</sup><br>=HC <sup>1</sup> C <sup>2</sup>                 | 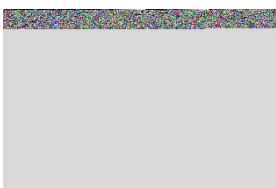   |    | 0                                                 | 0                                                |
| 2.<br>C <sup>1</sup> C <sup>2</sup> +H<br>=C <sup>1</sup> HC <sup>2</sup>                |    |    | 0                                                 | 0                                                |
| 3.<br>HC <sup>1</sup> C <sup>2</sup> +H<br>=HC <sup>1</sup> HC <sup>2</sup>              |  |  | 0                                                 | 0                                                |
| 4.<br>C <sup>1</sup> HC <sup>2</sup> +H<br>=C <sup>1</sup> H <sub>2</sub> C <sup>2</sup> |  |  | 0.80                                              | 0.11                                             |
| 5.<br>H+HC <sup>1</sup> C <sup>2</sup><br>=H <sub>2</sub> C <sup>1</sup> C <sup>2</sup>  |  |  | 0                                                 | 0                                                |
| 6.<br>H+C <sup>1</sup> HC <sup>2</sup><br>=HC <sup>1</sup> HC <sup>2</sup>               |  |  | 0.80                                              | 0.29                                             |

---

|                                       |                                                                                     |                                                                                      |      |       |
|---------------------------------------|-------------------------------------------------------------------------------------|--------------------------------------------------------------------------------------|------|-------|
| 7.<br>$H+H_2C^1C^2$<br>$=H_3C^1C^2$   |    |    | 0    | 0     |
| 8.<br>$H_2C^1C^2+H$<br>$=H_2C^1HC^2$  |    |    | 0.09 | -0.10 |
| 9.<br>$H+C^1H_2C^2$<br>$=HC^1H_2C^2$  |    |    | 0.46 | 0.42  |
| 10.<br>$HC^1HC^2+H$<br>$=HC^1H_2C^2$  |   |   | 0    | 0     |
| 11.<br>$C^1H_2C^2+H$<br>$=C^1H_3C^2$  |  |  | 0    | 0     |
| 12.<br>$H+HC^1HC^2$<br>$=H_2C^1HC^2$  |  |  | 0    | 0     |
| 13.<br>$H_3C^1C^2+H$<br>$=H_3C^1HC^2$ |  |  | 0.67 | 0.02  |

---

---

|                                            |                                                                                     |                                                                                      |      |      |
|--------------------------------------------|-------------------------------------------------------------------------------------|--------------------------------------------------------------------------------------|------|------|
| 14.<br>$H+HC^1H_2C^2$<br>$=H_2C^1H_2C^2$   |    |    | 0    | 0    |
| 15.<br>$HC^1H_2C^2+H$<br>$=HC^1H_3C^2$     |    |    | 0.13 | 0.10 |
| 16.<br>$H_2C^1HC^2+H$<br>$=H_2C^1H_2C^2$   |    |    | 0.06 | 0    |
| 17.<br>$H+H_2C^1HC^2$<br>$=H_3C^1HC^2$     |   |   | 0    | 0    |
| 18<br>$H+C^1H_3C^2$<br>$=HC^1H_3C^2$       |  |  | 0    | 0    |
| 19.<br>$H_2C^1H_2C^2+H$<br>$=H_2C^1H_3C^2$ |  |  | 0.55 | 0.10 |
| 20. $H+H_2C^1H_2C^2$<br>$=H_3C^1H_2C^2$    |  |  | 0    | 0    |

---

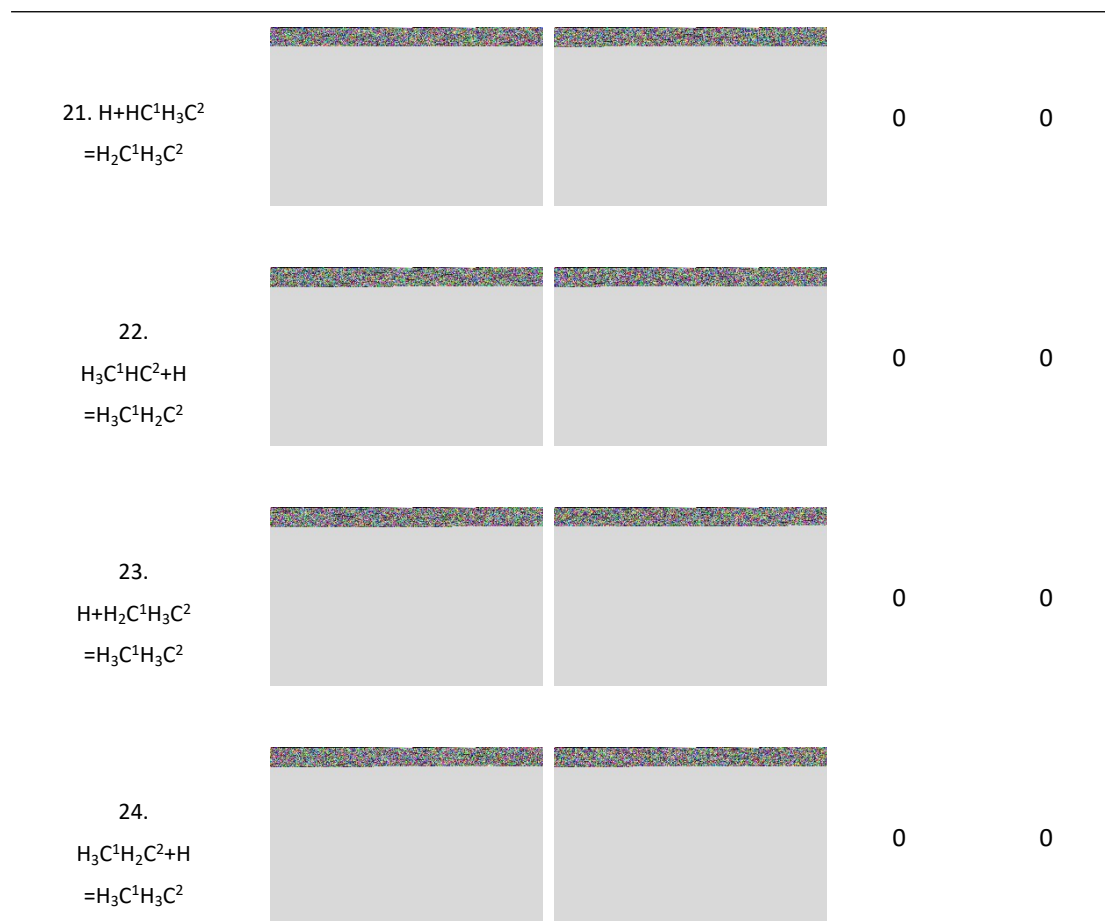

\*The reference structure of the  $\text{C}_2$  stepwise hydrogenation pathway is the final structure of C-C coupling reaction.

**Figure S4.** The reactant structure, reference structure and the migration energy about the stepwise hydrogenation pathway of  $\text{C}_2$  species on hcp- $\text{Fe}_7\text{C}_3$  (211) surface. Blue: Fe atoms; gray: C atoms; white: H atoms.



## The structures of the elementary reactions in the carbon vacancy recover pathway

| Elementary reactions          | Initial states                                                                      | Transition states                                                                   | Final states                                                                          |
|-------------------------------|-------------------------------------------------------------------------------------|-------------------------------------------------------------------------------------|---------------------------------------------------------------------------------------|
| 1.<br>$H + C^1O$<br>$= HC^1O$ | 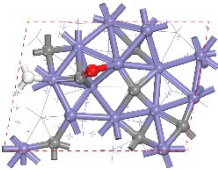   |    |    |
| 2.<br>$C^2O$<br>$= C^2+O$     |    |    |    |
| 3.<br>$H + C^2O$<br>$= HC^2O$ |    |    |    |
| 4.<br>$C^1O$<br>$= C^1+O$     |  |  |  |
| 5.<br>$C^1O + H$<br>$= C^1OH$ |  |  |  |
| 6.<br>$C^2O + H$<br>$= C^2OH$ |  |  |  |
| 7.<br>$HC^1O$<br>$= C^1H+O$   |  |  |  |

---

8.  
 $\text{H} + \text{HC}^{\text{I}}\text{O}$   
 $= \text{H}_2\text{C}^{\text{I}}\text{O}$

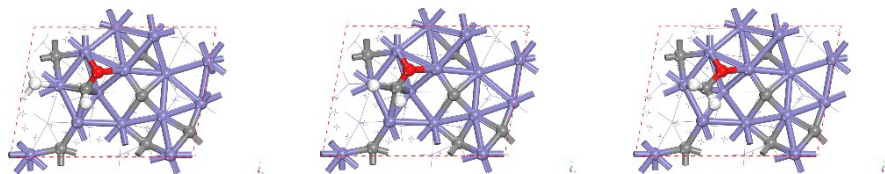

9.  
 $\text{HC}^{\text{I}}\text{O} + \text{H}$   
 $= \text{HC}^{\text{I}}\text{OH}$

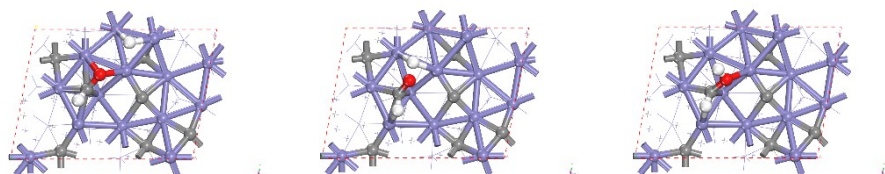

---

**Figure S5.** The structures of initial states, transition states, and final states about carbon vacancy recover pathway on hcp-Fe<sub>7</sub>C<sub>3</sub> (211) surface. Blue: Fe atoms; gray: C atoms; red: O atoms; white: H atoms.

## The structures of the elementary reactions in oxygen remove pathway

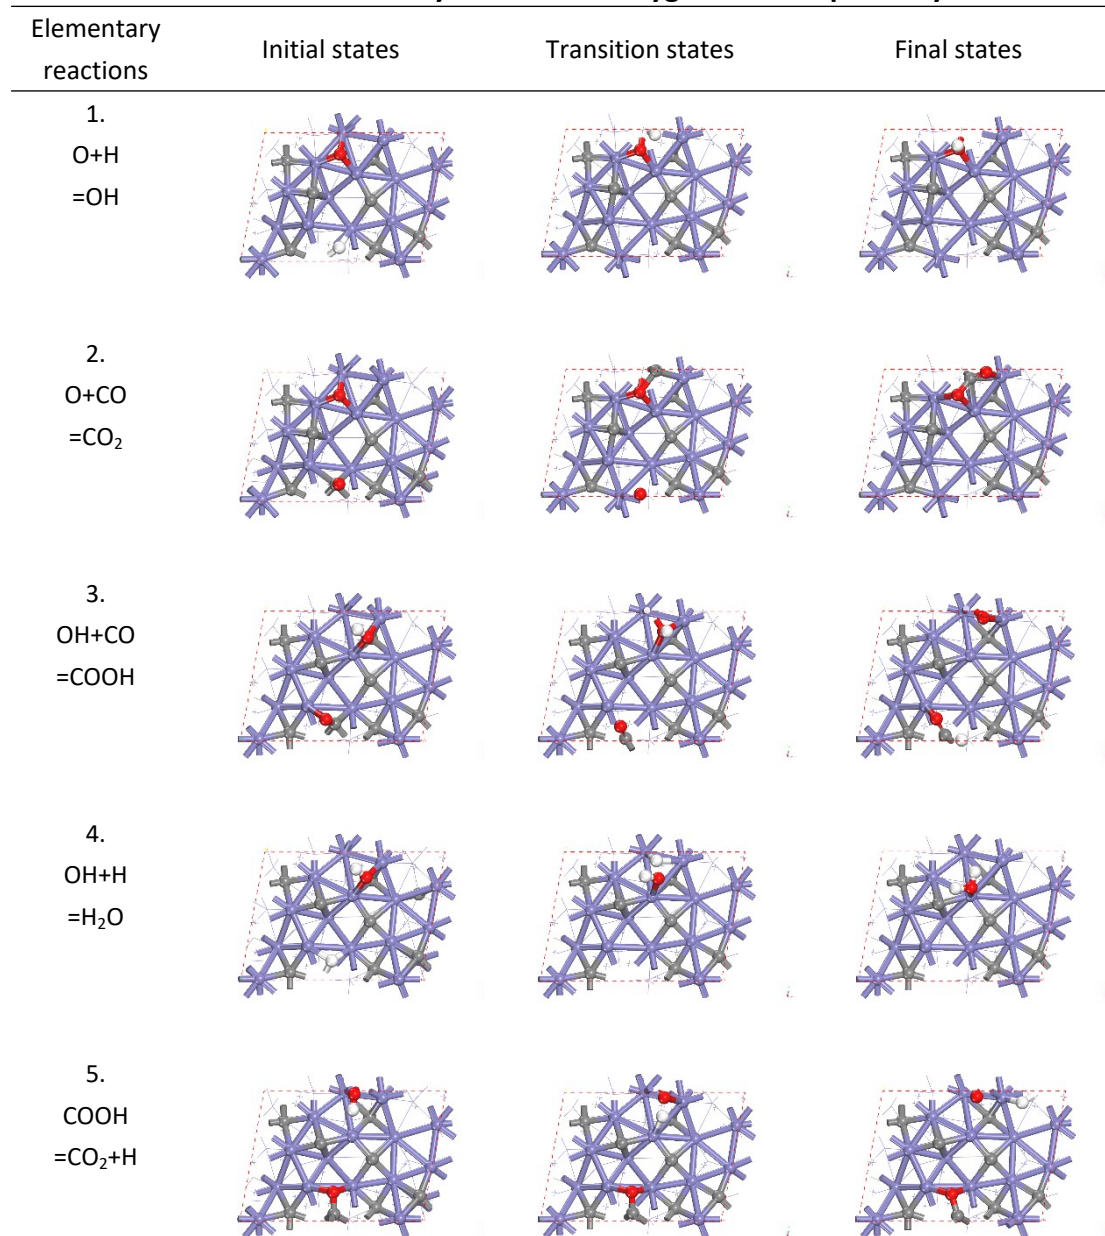

**Figure S6.** The structures of initial states, transition states, and final states about the oxygen remove pathway on hcp-Fe<sub>7</sub>C<sub>3</sub> (211) surface. Blue: Fe atoms; gray: C atoms; red: O atoms; white: H atoms.

## The barrier energy and structures of the migration reactions in the oxygen remove pathway

| Elementary reactions              | reactant structure | Reference structure* | Highest barrier energy of migration reaction (eV) | Total reaction energy of migration reaction (eV) |
|-----------------------------------|--------------------|----------------------|---------------------------------------------------|--------------------------------------------------|
| 1.<br>O+H<br>=OH                  |                    |                      | 0                                                 | 0                                                |
| 2.<br>O+CO<br>=CO <sub>2</sub>    |                    |                      | 0                                                 | 0                                                |
| 3.<br>OH+CO<br>=COOH              |                    |                      | 0.07                                              | -0.01                                            |
| 4.<br>OH+H<br>=H <sub>2</sub> O   |                    |                      | 0.07                                              | -0.01                                            |
| 5.<br>COOH<br>=CO <sub>2</sub> +H |                    |                      | 0.27                                              | -0.02                                            |

\*The reference structure of the O remove pathway is the final structure of the former elementary reaction.

**Figure S7.** The reactant structure, reference structure and the migration energy about the oxygen remove pathway on hcp-Fe<sub>7</sub>C<sub>3</sub> (211) surface. Blue: Fe atoms; gray: C atoms; red: O atoms; white: H atoms.
